# Supplementary material for: Enhanced catalytic phenol hydroxylation by CuZnFeAl layered double hydroxides: synergistic effects of Cu+ and oxygen vacancies
Source: Royal Society of Chemistry journal article supplement (doi:10.1039/d0nj03905e), 2020-10-27
Supplement: d0nj03905e1.pdf [file d0nj03905e1.pdf]

## Supplementary Information

# Enhanced catalytic phenol hydroxylation by CuZnFeAl layer double hydroxides: synergistic effects of Cu<sup>+</sup> and oxygen vacancies

Yong Jiang<sup>a, ‡</sup>, Dr. Wenlong Xu<sup>b, ‡</sup>, Prof. Jinhua Liang<sup>b, \*</sup>, Jiecan Shen<sup>a</sup>, Xiaomin Fu<sup>b</sup>, Haimin He<sup>a</sup>,  
Shichang Yan<sup>a</sup> and Prof. Xiaoqian Ren<sup>a, \*</sup>

<sup>a</sup> College of Chemistry and Chemical Engineering, Nanjing Tech University, Nanjing China, 211816

<sup>b</sup> College of Biotechnology and Pharmaceutical Engineering, Nanjing Tech University, Nanjing China, 211816,

<sup>†</sup> Electronic supplementary information (ESI) available.

<sup>‡</sup> These two authors contributed equally in composing it.

Corresponding authors: Tel.: +86 18915906233 (Xiaoqian Ren), +86 13770598601 (Jinhua Liang).  
E-mail address: xqren@njtech.edu.cn (Xiaoqian Ren), jhliang@njtech.edu.cn (Jinhua Liang).

**Contents**

**Table S1-16.** Inverse gas chromatography data.

**Figure S1.** The regeneration performance of the 15/CuZnFeAl-LDH.

**Figure S2.** The relationship between the values of  $K_a/K_b$ , oxygen vacancies percentage and benzenediol yield.

**Table S1** The properties of probes used for IGC Measurements

| Probe     | Character  | $a \times 10^{20}/\text{m}^2$ | $\gamma_1^d/\text{mJ}\cdot\text{m}^{-2}$ | $\text{AN}^*/\text{KJ}\cdot\text{mol}^{-1}$ | $\text{DN}/\text{KJ}\cdot\text{mol}^{-1}$ | $2aN(\gamma_1^d)^{0.5}$ |
|-----------|------------|-------------------------------|------------------------------------------|---------------------------------------------|-------------------------------------------|-------------------------|
| n-hexane  | apolar     | 0.515                         | 18.4                                     | --                                          | --                                        | 2.6598                  |
| n-heptane | apolar     | 0.570                         | 20.3                                     | --                                          | --                                        | 3.0921                  |
| n-octane  | apolar     | 0.630                         | 21.3                                     | --                                          | --                                        | 3.4896                  |
| n-nonane  | apolar     | 0.690                         | 22.7                                     | --                                          | --                                        | 3.9581                  |
| DCM       | acidic     | 0.315                         | 27.6                                     | 16.32                                       | 0.00                                      | 1.9925                  |
| TCM       | acidic     | 0.440                         | 25.9                                     | 22.60                                       | 0.00                                      | 2.6960                  |
| DEE       | amphoteric | 0.470                         | 47.0                                     | 5.86                                        | 80.37                                     | 2.1916                  |
| THF       | basic      | 0.450                         | 22.5                                     | 2.09                                        | 83.72                                     | 2.5700                  |
| Acet      | amphoteric | 0.480                         | 19.6                                     | 6.28                                        | 71.58                                     | 2.5586                  |

\*DCM-Dichloromethane; TCM-Chloroform; THF-Tetrahydrofuran; DEE-Diethylether; Acet-Ethylacetate.

The corresponding donor and corrected acceptor numbers were taken from reference [1].

[1] F. L. Riddle and F. M. Fowkes, J. Am. Chem. Soc., 1990, 112, 3259-3264.

## 5/CuZnFeAl-LDH catalyst

Table S2 Retention time, Vn, and RTlnVn of LDH catalyst in different temperatures

| Temperature | Probe     | Retention time / min | Vn     | RTlnVn |
|-------------|-----------|----------------------|--------|--------|
| 343.15 K    | n-hexane  | 0.247                | 0.341  | -3.066 |
|             | n-heptane | 0.528                | 0.728  | -0.905 |
|             | n-octane  | 3.006                | 4.145  | 4.052  |
|             | n-nonane  | 4.819                | 6.645  | 5.398  |
|             | DCM       | 0.652                | 0.899  | -0.306 |
|             | TCM       | 2.609                | 3.597  | 3.648  |
|             | DEE       | 0.454                | 0.626  | -1.334 |
|             | THF       | 0.851                | 1.174  | 0.456  |
|             | Acet      | 0.635                | 0.875  | -0.382 |
| 353.15 K    | n-hexane  | 0.125                | 0.177  | -5.091 |
|             | n-heptane | 0.450                | 0.639  | -1.317 |
|             | n-octane  | 2.532                | 3.593  | 3.760  |
|             | n-nonane  | 4.296                | 6.097  | 5.315  |
|             | DCM       | 0.231                | 0.328  | -3.277 |
|             | TCM       | 1.733                | 1.733  | 1.616  |
|             | DEE       | 0.271                | 0.271  | -3.841 |
|             | THF       | 0.611                | 0.611  | -1.450 |
|             | Acet      | 0.420                | 0.420  | -2.552 |
| 363.15 K    | n-hexane  | 0.106                | 0.155  | -5.630 |
|             | n-heptane | 0.389                | 0.567  | -1.714 |
|             | n-octane  | 1.802                | 2.629  | 2.919  |
|             | n-nonane  | 3.375                | 4.923  | 4.814  |
|             | DCM       | 0.250                | -1.385 | -4.183 |
|             | TCM       | 1.168                | 0.155  | 0.467  |
|             | DEE       | 0.197                | -1.627 | -4.914 |
|             | THF       | 0.482                | -0.729 | -2.203 |
|             | Acet      | 0.309                | -1.176 | -3.551 |
| 373.15 K    | n-hexane  | 0.078                | 0.117  | -6.651 |
|             | n-heptane | 0.364                | 0.546  | -1.876 |
|             | n-octane  | 1.469                | 2.202  | 2.447  |
|             | n-nonane  | 3.135                | 4.699  | 4.797  |
|             | DCM       | 0.1001               | 0.150  | -5.882 |
|             | TCM       | 0.496                | 0.744  | -0.917 |
|             | DEE       | 0.090                | 0.135  | -6.206 |
|             | THF       | 0.217                | 0.326  | -3.474 |
|             | Acet      | 0.141                | 0.212  | -4.805 |

343.15 K  $y=7.0189x-21.7917$   $R^2=0.9701$ 353.15 K  $y=8.3981x-27.0460$   $R^2=0.9761$ 363.15 K  $y=8.3310x-27.3944$   $R^2=0.9826$ 373.15 K  $y=8.9671x-29.9111$   $R^2=0.9855$ Table S3  $\gamma_s^d$  values of LDH catalyst versus temperature

|                | $\gamma_s^d / \text{mJ}\cdot\text{mol}^{-1}$ |        |        |        |
|----------------|----------------------------------------------|--------|--------|--------|
| Temperature    | 343.15                                       | 353.15 | 363.15 | 373.15 |
| 5/CuZnFeAl-LDH | 49.26                                        | 70.53  | 69.41  | 80.41  |

**Table S4** Adsorption free energy and adsorption enthalpy of polar probes on the surface of LDH catalyst

| Temperature/<br>K | $-\Delta G^{\text{SP}} / \text{KJ}\cdot\text{mol}^{-1}$ |         |         |         | $-\Delta H_a^s / \text{KJ}\cdot\text{mol}^{-1}$ |
|-------------------|---------------------------------------------------------|---------|---------|---------|-------------------------------------------------|
|                   | 343.15K                                                 | 353.15K | 363.15K | 373.15K |                                                 |
| DCM               | 7.501                                                   | 7.036   | 6.612   | 6.162   | 22.2978(R <sup>2</sup> =0.9999)                 |
| TCM               | 6.517                                                   | 6.021   | 5.401   | 4.819   | 26.1069(R <sup>2</sup> =0.9994)                 |
| DEE               | 5.075                                                   | 4.800   | 4.222   | 4.053   | 17.7296(R <sup>2</sup> =0.9887)                 |
| THF               | 4.209                                                   | 4.013   | 3.781   | 3.392   | 13.7420(R <sup>2</sup> =0.9930)                 |
| Acet              | 3.451                                                   | 3.007   | 2.528   | 2.163   | 18.2427(R <sup>2</sup> =0.9990)                 |

$$y=0.1324x+1.2793 \text{ (R}^2=0.9978\text{)}$$

$$K_a=0.1324$$

$$K_b=1.2793$$

$$K_a+K_b=1.4297$$

$$K_a / K_b =0.1021$$

**10/CuZnFeAl-LDH catalyst****Table S5** Retention time,  $V_n$ , and  $RT \ln V_n$  of LDH catalyst in different temperatures

| Temperature | Probe     | Retention time / min | $V_n$ | $RT \ln V_n$ |
|-------------|-----------|----------------------|-------|--------------|
| 343.15 K    | n-hexane  | 0.307                | 0.423 | -2.452       |
|             | n-heptane | 1.025                | 1.413 | 0.985        |
|             | n-octane  | 2.519                | 3.473 | 3.548        |
|             | n-nonane  | 4.181                | 5.765 | 4.993        |
|             | DCM       | 2.959                | 4.080 | 4.008        |
|             | TCM       | 4.042                | 5.573 | 4.897        |
|             | DEE       | 2.560                | 2.560 | 2.680        |
|             | THF       | 1.908                | 1.908 | 1.842        |
|             | Acet      | 1.358                | 1.358 | 0.873        |
| 353.15 K    | n-hexane  | 0.253                | 0.359 | -3.012       |
|             | n-heptane | 0.654                | 0.928 | -0.220       |
|             | n-octane  | 1.500                | 2.129 | 2.222        |
|             | n-nonane  | 3.268                | 4.638 | 4.511        |
|             | DCM       | 1.938                | 2.751 | 2.975        |
|             | TCM       | 2.234                | 3.171 | 3.393        |
|             | DEE       | 1.084                | 1.539 | 1.267        |
|             | THF       | 1.328                | 1.885 | 0.634        |
|             | Acet      | 0.574                | 0.814 | -0.606       |
| 363.15 K    | n-hexane  | 0.147                | 0.214 | -4.656       |
|             | n-heptane | 0.298                | 0.435 | -2.514       |
|             | n-octane  | 0.892                | 1.301 | 0.795        |
|             | n-nonane  | 2.111                | 3.080 | 3.397        |
|             | DCM       | 0.725                | 1.058 | 0.170        |
|             | TCM       | 0.958                | 1.398 | 1.013        |
|             | DEE       | 0.451                | 0.658 | -1.262       |
|             | THF       | 0.337                | 0.492 | -2.141       |
|             | Acet      | 0.225                | 0.328 | -3.364       |
| 373.15 K    | n-hexane  | 0.130                | 0.195 | -5.068       |
|             | n-heptane | 0.180                | 0.270 | -4.059       |
|             | n-octane  | 0.620                | 0.929 | -0.228       |
|             | n-nonane  | 1.580                | 2.368 | 2.672        |
|             | DCM       | 0.454                | 0.681 | -1.191       |
|             | TCM       | 0.713                | 1.069 | -0.208       |
|             | DEE       | 0.292                | 0.437 | -2.564       |
|             | THF       | 0.230                | 0.345 | -3.299       |
|             | Acet      | 0.129                | 0.194 | -5.080       |

343.15 K  $y=5.7740x-17.2850$   $R^2=0.9803$ 353.15 K  $y=5.8174x-18.3216$   $R^2=0.9978$ 363.15 K  $y=6.3868x-21.8204$   $R^2=0.9955$ 373.15 K  $y=6.2930x-22.4371$   $R^2=0.9779$ **Table S6**  $\gamma_s^d$  values of LDH catalyst versus temperature

|                 | $\gamma_s^d / \text{mJ}\cdot\text{mol}^{-1}$ |        |        |        |
|-----------------|----------------------------------------------|--------|--------|--------|
| Temperature     | 343.15                                       | 353.15 | 363.15 | 373.15 |
| 10/CuZnFeAl-LDH | 33.34                                        | 33.84  | 40.79  | 39.60  |

**Table S7** Adsorption free energy and adsorption enthalpy of polar probes on the surface of LDH catalyst

| Temperature/<br>K | $-\Delta G^{\text{SP}} / \text{KJ}\cdot\text{mol}^{-1}$ |         |         |         | $-\Delta H_a^s / \text{KJ}\cdot\text{mol}^{-1}$ |
|-------------------|---------------------------------------------------------|---------|---------|---------|-------------------------------------------------|
|                   | 343.15K                                                 | 353.15K | 363.15K | 373.15K |                                                 |
| DCM               | 9.788                                                   | 9.705   | 9.265   | 8.707   | 23.0111( $R^2=0.9849$ )                         |
| TCM               | 6.615                                                   | 6.031   | 5.615   | 5.263   | 22.1883( $R^2=0.9963$ )                         |
| DEE               | 7.311                                                   | 6.839   | 6.561   | 6.081   | 20.7991( $R^2=0.9977$ )                         |
| THF               | 4.288                                                   | 4.005   | 3.265   | 2.965   | 20.5662( $R^2=0.9879$ )                         |
| Acet              | 3.385                                                   | 2.831   | 2.115   | 1.256   | 27.0355( $R^2=0.9961$ )                         |

$$y=0.2144x+1.2224 \quad (R^2=0.9912)$$

$$K_a=0.2144$$

$$K_b=1.2224$$

$$K_a+K_b=1.4368$$

$$K_a / K_b = 0.1754$$

**15/CuZnFeAl-LDH catalyst****Table S8** Retention time, Vn, and RTlnVn of LDH catalyst in different temperatures

| Temperature | Probe     | Retention time / min | Vn    | RTlnVn |
|-------------|-----------|----------------------|-------|--------|
| 343.15 K    | n-hexane  | 0.264                | 0.364 | -2.880 |
|             | n-heptane | 0.695                | 0.695 | -1.037 |
|             | n-octane  | 1.351                | 1.351 | 0.857  |
|             | n-nonane  | 2.112                | 2.112 | 2.131  |
|             | DCM       | 2.018                | 2.782 | 2.916  |
|             | TCM       | 3.773                | 5.202 | 4.699  |
|             | DEE       | 1.243                | 1.714 | 1.535  |
|             | THF       | 1.241                | 1.711 | 1.530  |
|             | Acet      | 2.575                | 3.550 | 3.610  |
| 353.15 K    | n-hexane  | 0.195                | 0.277 | -3.774 |
|             | n-heptane | 0.425                | 0.603 | -1.487 |
|             | n-octane  | 1.265                | 1.795 | 1.720  |
|             | n-nonane  | 1.892                | 2.685 | 2.904  |
|             | DCM       | 0.939                | 1.332 | 0.844  |
|             | TCM       | 2.396                | 3.401 | 3.600  |
|             | DEE       | 0.628                | 0.891 | -0.337 |
|             | THF       | 0.630                | 0.894 | -0.330 |
|             | Acet      | 1.603                | 2.275 | 2.415  |
| 363.15 K    | n-hexane  | 0.156                | 0.228 | -4.465 |
|             | n-heptane | 0.356                | 0.519 | -1.981 |
|             | n-octane  | 1.035                | 1.510 | 1.245  |
|             | n-nonane  | 1.359                | 1.983 | 2.068  |
|             | DCM       | 0.663                | 0.967 | -0.102 |
|             | TCM       | 1.751                | 2.555 | 2.831  |
|             | DEE       | 0.424                | 0.619 | -1.451 |
|             | THF       | 0.382                | 0.557 | -1.767 |
|             | Acet      | 0.834                | 1.217 | 0.593  |
| 373.15 K    | n-hexane  | 0.103                | 0.154 | -5.799 |
|             | n-heptane | 0.269                | 0.403 | -2.817 |
|             | n-octane  | 0.865                | 1.297 | 0.806  |
|             | n-nonane  | 1.163                | 1.743 | 1.722  |
|             | DCM       | 0.346                | 0.518 | -2.039 |
|             | TCM       | 0.989                | 1.483 | 1.221  |
|             | DEE       | 0.197                | 0.296 | -3.772 |
|             | THF       | 0.193                | 0.290 | -3.840 |
|             | Acet      | 0.422                | 0.632 | -1.422 |

343.15 K  $y=3.9303x-13.2017$   $R^2=0.9935$ 353.15 K  $y=5.3815x-17.9178$   $R^2=0.9811$ 363.15 K  $y=5.2781x-18.2004$   $R^2=0.9712$ 373.15 K  $y=6.0552x-21.5035$   $R^2=0.9703$ **Table S9**  $\gamma_s^d$  values of LDH catalyst versus temperature



|                 | $\gamma_s^d / \text{mJ}\cdot\text{mol}^{-1}$ |        |        |        |
|-----------------|----------------------------------------------|--------|--------|--------|
| Temperature     | 343.15                                       | 353.15 | 363.15 | 373.15 |
| 15/CuZnFeAl-LDH | 15.48                                        | 28.96  | 27.86  | 36.67  |

**Table S10** Adsorption free energy and adsorption enthalpy of polar probes on the surface of LDH catalyst

| Temperature/<br>K | $-\Delta G^{\text{SP}} / \text{KJ}\cdot\text{mol}^{-1}$ |         |         |         | $-\Delta H_a^s / \text{KJ}\cdot\text{mol}^{-1}$ |
|-------------------|---------------------------------------------------------|---------|---------|---------|-------------------------------------------------|
|                   | 343.15K                                                 | 353.15K | 363.15K | 373.15K |                                                 |
| DCM               | 8.287                                                   | 8.039   | 7.582   | 7.400   | 18.4667(R <sup>2</sup> =0.9953)                 |
| TCM               | 7.305                                                   | 7.009   | 6.802   | 6.409   | 17.9583(R <sup>2</sup> =0.9975)                 |
| DEE               | 6.123                                                   | 5.787   | 5.182   | 4.461   | 25.7829(R <sup>2</sup> =0.9923)                 |
| THF               | 4.631                                                   | 3.757   | 2.869   | 2.102   | 24.5657(R <sup>2</sup> =0.9988)                 |
| Acet              | 6.756                                                   | 6.564   | 5.289   | 4.589   | 33.3109(R <sup>2</sup> =0.9769)                 |

$$y=0.2673x+1.1930 \text{ (R}^2=0.9831\text{)}$$

$$K_a=0.2673$$

$$K_b=1.1930$$

$$K_a+K_b=1.4603$$

$$K_a / K_b =0.2241$$

**20/CuZnFeAl-LDH catalyst****Table S11** Retention time,  $V_n$ , and  $RT \ln V_n$  of LDH catalyst in different temperatures

| Temperature | Probe     | Retention time / min | $V_n$ | $RT \ln V_n$ |
|-------------|-----------|----------------------|-------|--------------|
| 343.15 K    | n-hexane  | 0.555                | 0.765 | -0.763       |
|             | n-heptane | 1.514                | 2.088 | 2.098        |
|             | n-octane  | 2.806                | 3.869 | 3.856        |
|             | n-nonane  | 4.528                | 6.244 | 5.220        |
|             | DCM       | 2.590                | 3.572 | 3.629        |
|             | TCM       | 3.475                | 4.792 | 4.465        |
|             | DEE       | 1.892                | 2.609 | 2.733        |
|             | THF       | 2.959                | 4.080 | 4.008        |
|             | Acet      | 2.292                | 3.161 | 3.280        |
| 353.15 K    | n-hexane  | 0.340                | 0.483 | -2.140       |
|             | n-heptane | 0.774                | 1.098 | 0.275        |
|             | n-octane  | 2.036                | 2.889 | 3.119        |
|             | n-nonane  | 3.447                | 4.892 | 4.668        |
|             | DCM       | 1.146                | 1.627 | 1.433        |
|             | TCM       | 1.855                | 2.633 | 2.847        |
|             | DEE       | 0.894                | 1.269 | 0.701        |
|             | THF       | 1.534                | 2.177 | 2.286        |
|             | Acet      | 1.194                | 1.694 | 1.549        |
| 363.15 K    | n-hexane  | 0.264                | 0.385 | -2.883       |
|             | n-heptane | 0.679                | 0.991 | -0.027       |
|             | n-octane  | 1.272                | 1.856 | 1.868        |
|             | n-nonane  | 1.875                | 2.735 | 3.039        |
|             | DCM       | 0.810                | 1.181 | 0.500        |
|             | TCM       | 1.209                | 1.763 | 1.712        |
|             | DEE       | 0.495                | 0.722 | -0.986       |
|             | THF       | 0.896                | 1.307 | 0.808        |
|             | Acet      | 0.625                | 0.912 | -0.277       |
| 373.15 K    | n-hexane  | 0.123                | 0.184 | -5.248       |
|             | n-heptane | 0.254                | 0.381 | -2.991       |
|             | n-octane  | 0.706                | 1.058 | 0.175        |
|             | n-nonane  | 1.175                | 1.761 | 1.754        |
|             | DCM       | 0.232                | 0.348 | -3.269       |
|             | TCM       | 0.431                | 0.646 | -1.353       |
|             | DEE       | 0.145                | 0.217 | -4.739       |
|             | THF       | 0.277                | 0.415 | -2.725       |
|             | Acet      | 0.204                | 0.306 | -3.669       |

343.15 K  $y=4.5761x-12.4979$   $R^2=0.9825$ 353.15 K  $y=5.3971x-16.3295$   $R^2=0.9900$ 363.15 K  $y=4.5608x-14.5511$   $R^2=0.9783$ 373.15 K  $y=5.6050x-20.0733$   $R^2=0.9886$ **Table S12**  $\gamma_s^d$  values of LDH catalyst versus temperature

|                 | $\gamma_s^d / \text{mJ}\cdot\text{mol}^{-1}$ |        |        |        |
|-----------------|----------------------------------------------|--------|--------|--------|
| Temperature     | 343.15                                       | 353.15 | 363.15 | 373.15 |
| 20/CuZnFeAl-LDH | 20.94                                        | 29.13  | 20.80  | 31.42  |

**Table S13** Adsorption free energy and adsorption enthalpy of polar probes on the surface of LDH catalyst

| Temperature/<br>K | $-\Delta G^{\text{SP}} / \text{KJ}\cdot\text{mol}^{-1}$ |         |         |         | $-\Delta H_a^s / \text{KJ}\cdot\text{mol}^{-1}$ |
|-------------------|---------------------------------------------------------|---------|---------|---------|-------------------------------------------------|
|                   | 343.15K                                                 | 353.15K | 363.15K | 373.15K |                                                 |
| DCM               | 7.009                                                   | 6.391   | 5.964   | 5.636   | 22.9934(R <sup>2</sup> =0.9946)                 |
| TCM               | 4.626                                                   | 4.412   | 3.967   | 3.609   | 16.8564(R <sup>2</sup> =0.9951)                 |
| DEE               | 5.202                                                   | 4.513   | 3.570   | 3.050   | 30.0486(R <sup>2</sup> =0.9961)                 |
| THF               | 4.745                                                   | 4.098   | 3.638   | 2.943   | 24.6341(R <sup>2</sup> =0.9981)                 |
| Acet              | 4.069                                                   | 3.619   | 2.605   | 2.063   | 28.2833(R <sup>2</sup> =0.9910)                 |

$$y=0.2670x+1.2343 \text{ (R}^2=0.9974\text{)}$$

$$K_a=0.2670$$

$$K_b=1.2343$$

$$K_a+K_b=1.5013$$

$$K_a / K_b = 0.2163$$

**25/CuZnFeAl-LDH catalyst****Table S14** Retention time,  $V_n$ , and  $RT \ln V_n$  of LDH catalyst in different temperatures

| Temperature | Probe     | Retention time / min | $V_n$ | $RT \ln V_n$ |
|-------------|-----------|----------------------|-------|--------------|
| 343.15 K    | n-hexane  | 0.418                | 0.576 | -1.572       |
|             | n-heptane | 1.183                | 1.631 | 1.394        |
|             | n-octane  | 1.933                | 2.665 | 2.794        |
|             | n-nonane  | 3.819                | 5.266 | 4.735        |
|             | DCM       | 2.150                | 2.965 | 3.097        |
|             | TCM       | 2.382                | 3.284 | 3.387        |
|             | DEE       | 1.078                | 1.486 | 1.129        |
|             | THF       | 1.403                | 1.935 | 1.881        |
|             | Acet      | 1.588                | 2.190 | 2.233        |
| 353.15 K    | n-hexane  | 0.258                | 0.366 | -2.955       |
|             | n-heptane | 0.849                | 1.205 | 0.548        |
|             | n-octane  | 1.524                | 2.163 | 2.268        |
|             | n-nonane  | 2.850                | 4.045 | 4.109        |
|             | DCM       | 1.058                | 1.502 | 1.197        |
|             | TCM       | 1.290                | 1.831 | 1.779        |
|             | DEE       | 0.471                | 0.668 | -1.184       |
|             | THF       | 0.728                | 1.033 | 0.096        |
|             | Acet      | 0.684                | 0.971 | -0.085       |
| 363.15 K    | n-hexane  | 0.197                | 0.287 | -3.770       |
|             | n-heptane | 0.549                | 0.801 | -0.670       |
|             | n-octane  | 1.233                | 1.799 | 1.773        |
|             | n-nonane  | 1.765                | 2.575 | 2.856        |
|             | DCM       | 0.666                | 0.972 | -0.086       |
|             | TCM       | 0.918                | 1.340 | 0.886        |
|             | DEE       | 0.249                | 0.363 | -3.056       |
|             | THF       | 0.455                | 0.664 | -1.236       |
|             | Acet      | 0.386                | 0.563 | -1.734       |
| 373.15 K    | n-hexane  | 0.184                | 0.276 | -3.991       |
|             | n-heptane | 0.458                | 0.687 | -1.164       |
|             | n-octane  | 1.018                | 1.526 | 1.310        |
|             | n-nonane  | 1.443                | 2.163 | 2.392        |
|             | DCM       | 0.571                | 0.856 | -0.483       |
|             | TCM       | 0.722                | 1.083 | 0.247        |
|             | DEE       | 0.180                | 0.270 | -4.062       |
|             | THF       | 0.311                | 0.466 | -2.367       |
|             | Acet      | 0.288                | 0.431 | -2.609       |

343.15 K  $y=4.7317x-13.7762$   $R^2=0.9884$ 353.15 K  $y=5.3273x-16.5870$   $R^2=0.9823$ 363.15 K  $y=5.1713x-17.0175$   $R^2=0.9748$ 373.15 K  $y=5.0096x-16.8943$   $R^2=0.9780$ **Table S15**  $\gamma_s^d$  values of LDH catalyst versus temperature

|                 | $\gamma_s^d / \text{mJ}\cdot\text{mol}^{-1}$ |        |        |        |
|-----------------|----------------------------------------------|--------|--------|--------|
| Temperature     | 343.15                                       | 353.15 | 363.15 | 373.15 |
| 25/CuZnFeAl-LDH | 22.39                                        | 28.38  | 26.74  | 25.10  |

**Table S16** Adsorption free energy and adsorption enthalpy of polar probes on the surface of LDH catalyst

| Temperature/<br>K | $-\Delta G^{\text{SP}} / \text{KJ}\cdot\text{mol}^{-1}$ |         |         |         | $-\Delta H_a^s / \text{KJ}\cdot\text{mol}^{-1}$ |
|-------------------|---------------------------------------------------------|---------|---------|---------|-------------------------------------------------|
|                   | 343.15K                                                 | 353.15K | 363.15K | 373.15K |                                                 |
| DCM               | 7.445                                                   | 7.065   | 6.628   | 6.430   | 19.0520(R <sup>2</sup> =0.9959)                 |
| TCM               | 4.407                                                   | 4.016   | 3.962   | 3.635   | 12.0494(R <sup>2</sup> =0.9841)                 |
| DEE               | 4.535                                                   | 3.656   | 2.628   | 1.853   | 35.0073(R <sup>2</sup> =0.9990)                 |
| THF               | 3.497                                                   | 2.983   | 2.491   | 1.653   | 24.0072(R <sup>2</sup> =0.9930)                 |
| Acet              | 3.903                                                   | 2.861   | 2.052   | 1.468   | 31.0367(R <sup>2</sup> =0.9934)                 |

$$y=0.2649x+1.3686 \text{ (R}^2=0.9855\text{)}$$

$$K_a=0.2649$$

$$K_b=1.3686$$

$$K_a+K_b=1.6335$$

$$K_a / K_b =0.1936$$

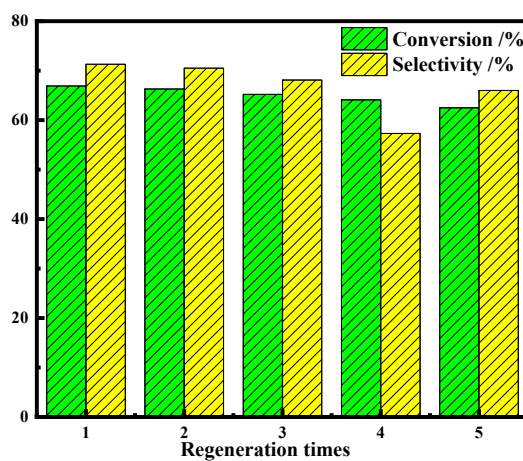**Figure. S1.** The regeneration performance of the 15/CuZnFeAl-LDH.

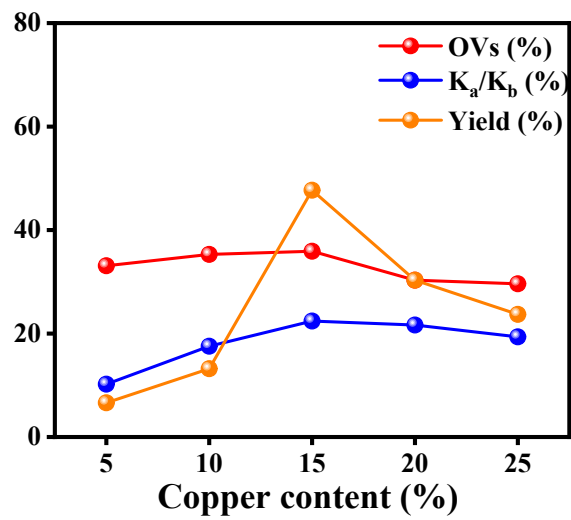

**Figure S2.** The relationship between the values of  $K_a/K_b$ , oxygen vacancies percentage and benzenediol yield.
